# Supplementary material
Source: MDPI journal article supplement (https://www.mdpi.com/2673-4591/31/1/83)
Supplement: s1 [file s1]

# Synthesis of Target-directed Nanogel Carrier with Glycopolymers and Their Application to Immunotherapy

Yuki Okuda, Shigehito Osawa, Hidenori Otsuka

Dept. of Chem., Grad. Sch. of Sci., Tokyo Univ. of Sci., Tokyo, Japan

## 1. Introduction

### Immunotherapy

Immunotherapy, which is based on antigen-specific immunity, is expected to be an effective and safe treatment for cancer and infectious diseases.

Stimulating cytotoxic T lymphocytes (CTL) is particularly important to obtain immune response.

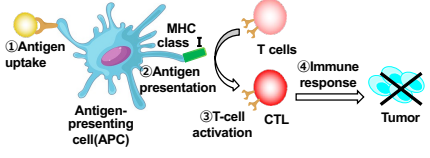

#### Challenges in CTL induction

- Less amount of antigen transferred to APC
- Sustaining antigen functionality during in vivo delivery

Requiring a carrier that preserves protein function

## 2. Previous research

### PEG/RADA-g-CS nanogel

Nano-sized gel particles (= nanogel) composed of cationic natural polymer of Chitosan (CS) grafting hydrophilic polymer of PEG and self-assembling peptide of RADA16 on the backbone

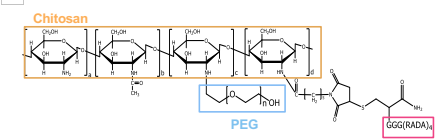

Nanogel formation driven by RADA16 assembly

- Highly efficient protein loading
- Slow release of the loaded protein

Issues  
Low cell affinity due to PEG  
Poor targeting

## 3. In this study

### Man/RADA-g-CS nanogel

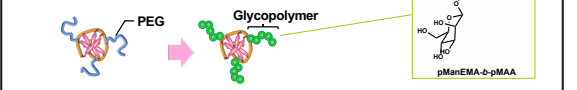

We assumed installing a ligand structure, which is widely acknowledged to target dendritic cells (DCs) as one of the APCs, on to the nanogel shell. → Utilizing glycopolymers with mannose (Man) moieties instead of PEG to express binding affinity to DC whereas sustaining the hydrophilic shell character

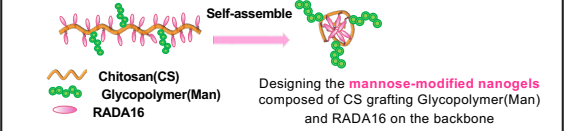

Designing the mannose-modified nanogels composed of CS grafting Glycopolymers (Man) and RADA16 on the backbone

In this presentation, preparation of the glycopolymer containing Man and its molecular targeting property based on Man were investigated.

## 4. Preparation of glycopolymer and model nanoparticles having Man on the surfaces

### Synthesis of glycopolymer

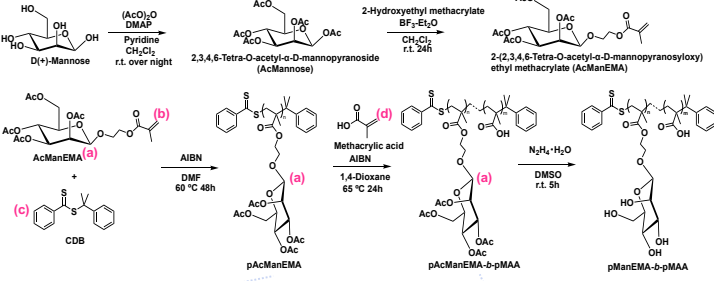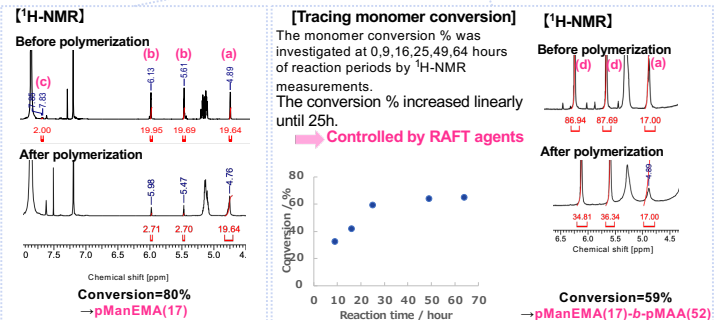

### Preparation of mannose-modified nanoparticles

A silica nanoparticle (SiNPs) was modified with an amino-terminated silane coupling agent (APTES). The installed amino group was reacted with the carboxylic acid of the glycopolymer through condensation reaction using 4-(4,6-Dimethoxy-1,3,5-triazin-2-yl)-4-methylmorpholinium Chloride (DMT-MM) to obtain mannose-modified nanoparticles (SiNP-Man).

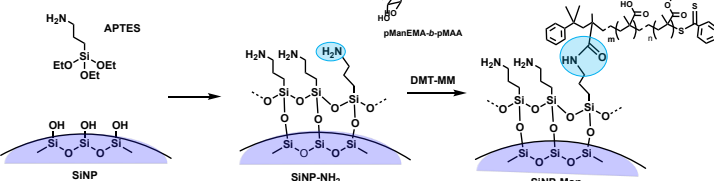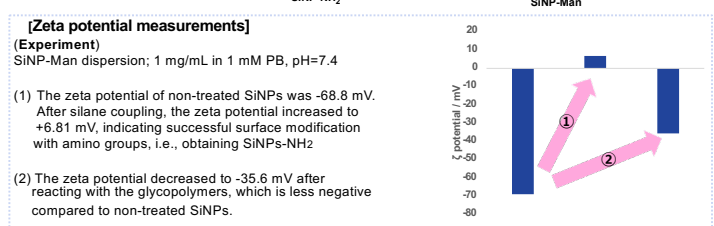

Achieving the glycopolymer modification on silica surface, obtaining SiNP-Man

## 5. Molecular recognition property of SiNPs-Man

### Aggregation using lectin

We evaluated the aggregation behaviors of SiNPs-Man with the addition of ConA, a mannose-recognizing lectin, and RCA120, a galactose-recognizing lectin.

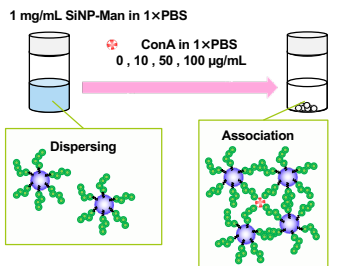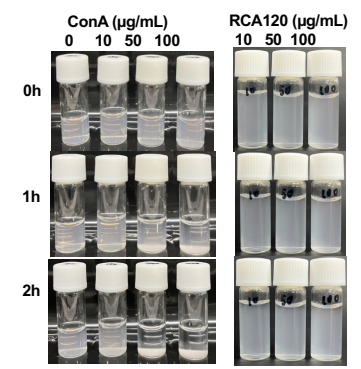

ConA concentrations of 50 and 100 µg/mL deposited the SiNPs-Man after 2 hours whereas RCA120 did not make deposition at any concentration, suggesting mannose-derived molecular recognition work on the SiNPs-Man surface to associate the particles.

### Aggregation inhibition

SiNP-Man were mixed with ConA under varied free mannose concentration which would be competitive for the ConA recognition.

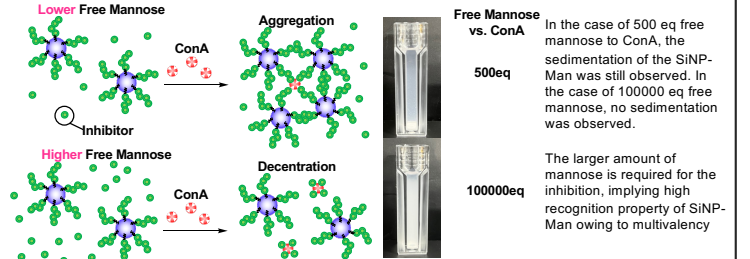

### [Turbidity measured with spectrophotometer]

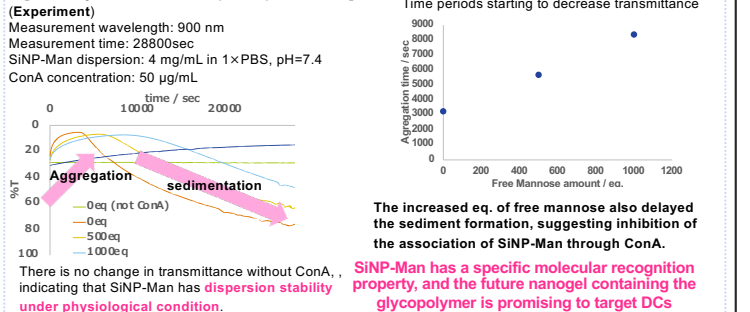

## 6. Conclusion and future work

- Glycopolymer pAcManEMA-b-pMAA block copolymer was prepared via RAFT polymerization
- Silica nanoparticles were successfully modified with glycopolymers, which have the well dispersion property.
- Specific lectin recognition derived from mannose was observed using mannose-modified silica nanoparticles, showing potency to extended application of nanogels targeting dendritic cells.
- Quantification of requiring mannose density on the surface to show the specific binding
- Synthesis and characterization of Man/RADA-g-CS
